# Supplementary material
Source: PubMed Central journal article supplement (PMC6179440)
Supplement: NIHMS990385-supplement-Supplemental_Figures_S1-S9_and_Table_S1.pdf [file NIHMS990385-supplement-Supplemental_Figures_S1-S9_and_Table_S1.pdf]

## Supplementary Materials for

### **The nociceptin receptor inhibits axonal regeneration and recovery from spinal cord injury**

Yuichi Sekine, Chad S. Siegel, Tomoko Sekine-Konno, William B. J. Cafferty,  
Stephen M. Strittmatter\*

\*Corresponding author. Email: [stephen.strittmatter@yale.edu](mailto:stephen.strittmatter@yale.edu)

Published 3 April 2018, *Sci. Signal.* **11**, eaao4180 (2018)  
DOI: 10.1126/scisignal.aao4180

#### **This PDF file includes:**

- Fig. S1. NgR1 interacts with ORL1.
- Fig. S2. ORL1 interacts with NgR1 and NgR2.
- Fig. S3. Quantification of NgR1 protein in PI-PLC-treated HEK293T cells.
- Fig. S4. Identification of O-glycosylation sites in NgR1.
- Fig. S5. Reduction of ORL1 decreases NgR1 expression in Neuro2A and neurons.
- Fig. S6. Effect of J113397 on nociceptin- and Nogo-mediated inhibition of regeneration.
- Fig. S7. Motor performance after SCI and J113397 treatment.
- Fig. S8. Effect of high-dose J113397.
- Fig. S9. Model for nociception/ORL1-mediated regulation of neural repair in relation to NgR1.
- Table S1. Gene expression in brainstem after SCI in *Ngr1*<sup>-/-</sup> and *Ngr1*<sup>+/-</sup> mice.

## Figure S1

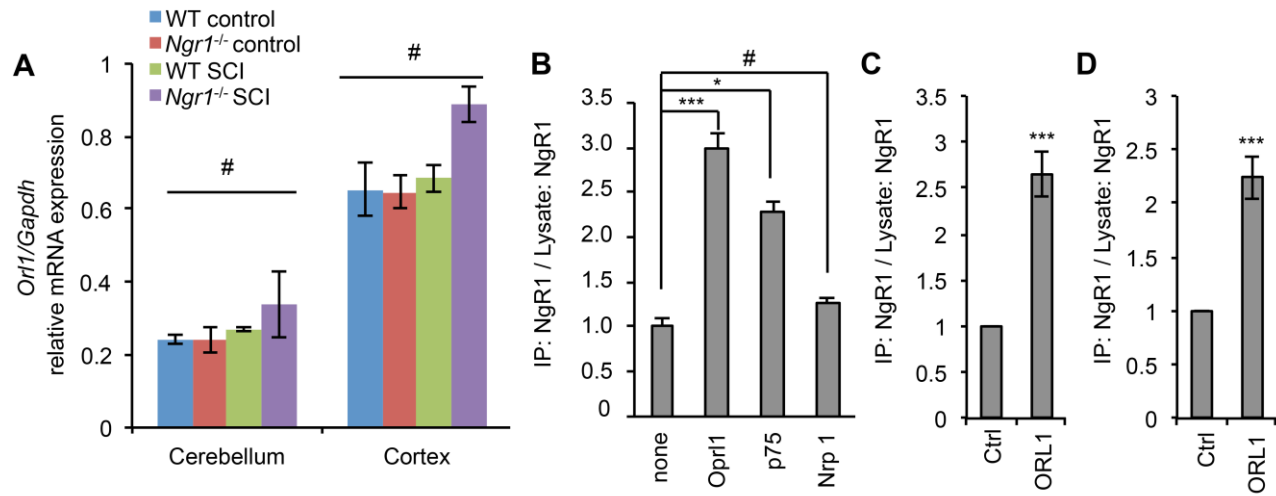

### Figure S1. NgR1 interacts with ORL1.

(A) The levels of the *ORL1* mRNA normalized to those of a *GAPDH* internal control in cerebellum and cortex. Tissues were from sham or SCI after 4d in WT or *Ngr1*<sup>-/-</sup> mice (N=3 mice for each group). Mean±SE. #, no significant differences, one-way ANOVA followed by Tukey's test.

(B) Quantification of FLAG-NgR1 protein levels in the immunoprecipitates normalized to total cell lysate in Fig1B from three independent experiments. Mean±SE. \*p<0.05, \*\*\*p<0.005, #, not significant, one-way ANOVA followed by Dunnett's test.

(C, D) Quantification of NgR1 protein levels in the immunoprecipitate normalized to total lysate in Fig. 1C and 1D from three independent experiments. Mean±SE. \*\*\*p<0.005, Student's two-tailed *t* test.

# Figure S2

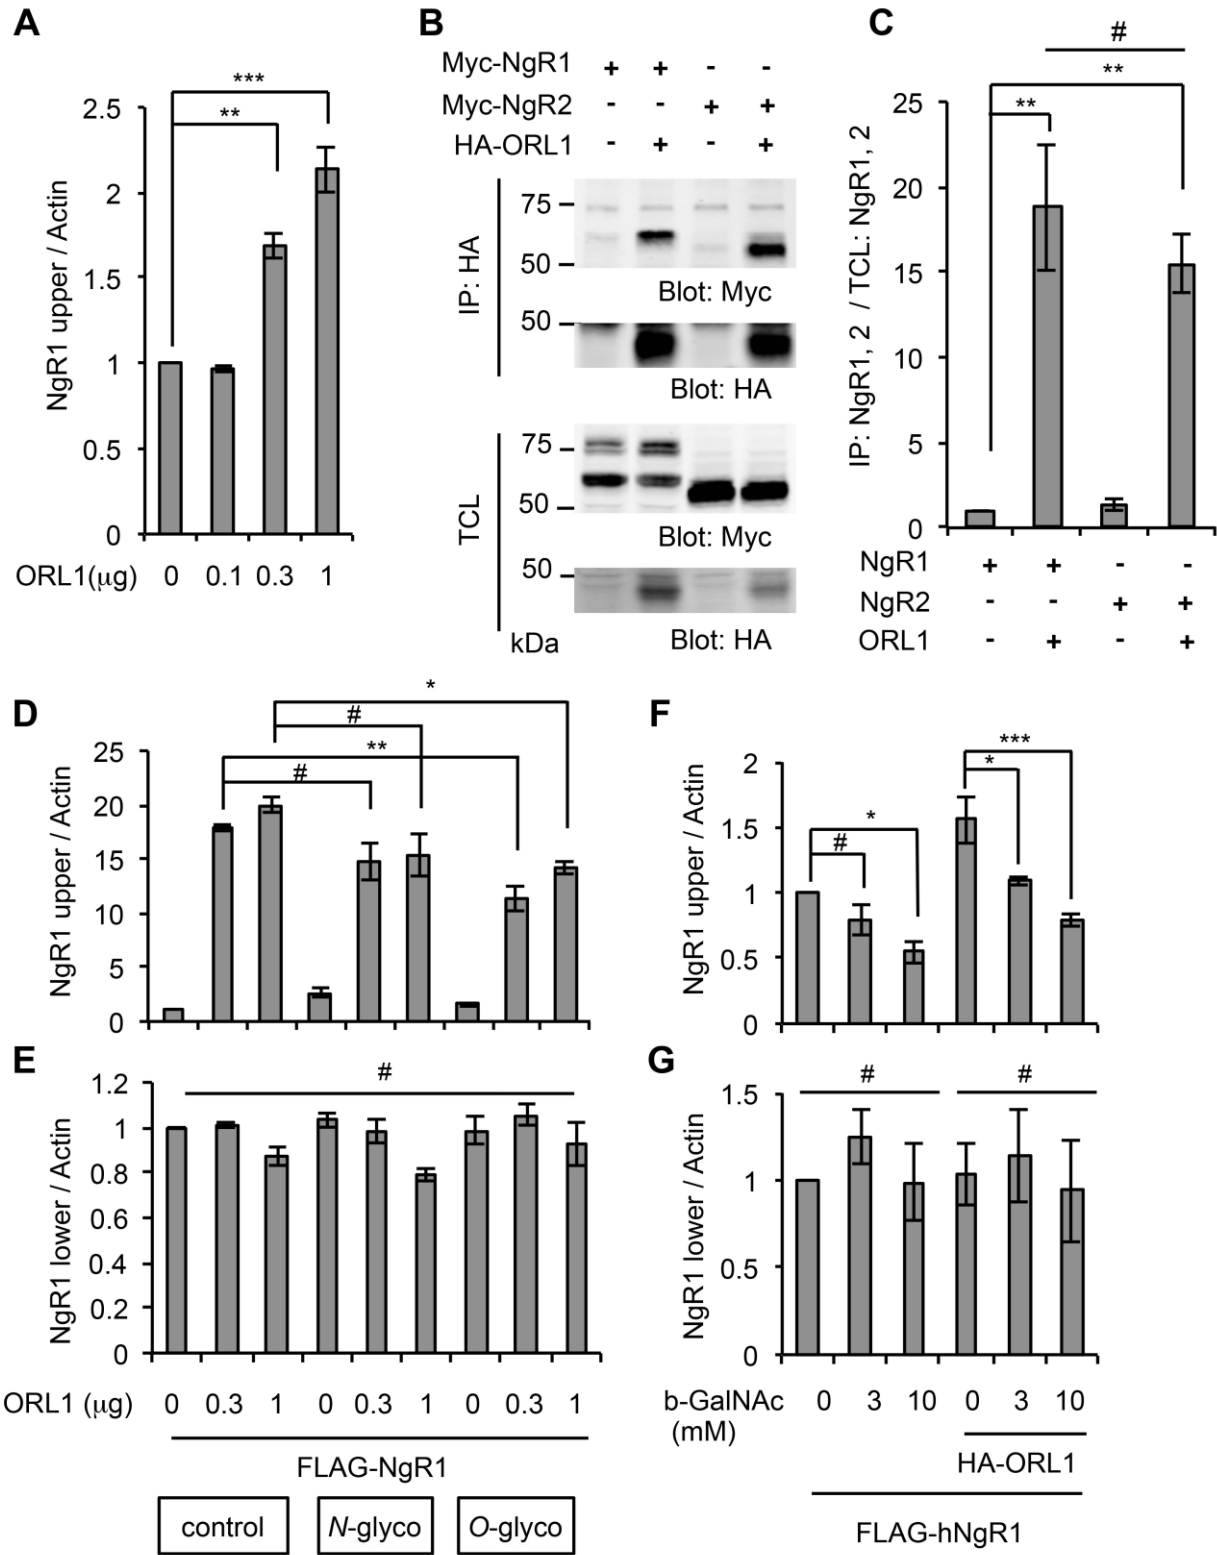

Figure S2. ORL1 interacts with NgR1 and NgR2.

(A) Quantification of NgR1 upper bands normalized to Actin in Fig. 2A from 3 independent experiments. Mean±SE. \*\*p<0.01, \*\*\*p<0.005, one-way ANOVA followed by Dunnett's test.

(B) HEK293T cells were transfected with Myc-NgR1 or Myc-NgR2 with or without HA-ORL1. After 36h, cells were lysed. HA immunoprecipitates were immunoblotted for Myc and HA. N=3 independent experiments.

(C) Quantification of Myc-NgR1 or Myc-NgR 2 protein levels in the immunoprecipitates normalized to total cell lysate (TCL) from three independent experiments. Mean±SE. \*\*p<0.01, #, no significant difference, one-way ANOVA followed by Tukey's test.

(D, E) Quantification of NgR1 upper (D) or lower (E) bands normalized to Actin from three independent experiments in Fig. 2B. Mean±SE.. \*p<0.05, \*\*p<0.001, #, no significant differences, one-way ANOVA followed by Tukey's test.

(F, G) Quantification of NgR1 upper (F) or lower (G) bands normalized to Actin from four independent experiments in Fig. 2C. Mean±SE. \*p<0.05, \*\*\*p<0.005, #, no significant differences, one-way ANOVA followed by Tukey's test.

## Figure S3

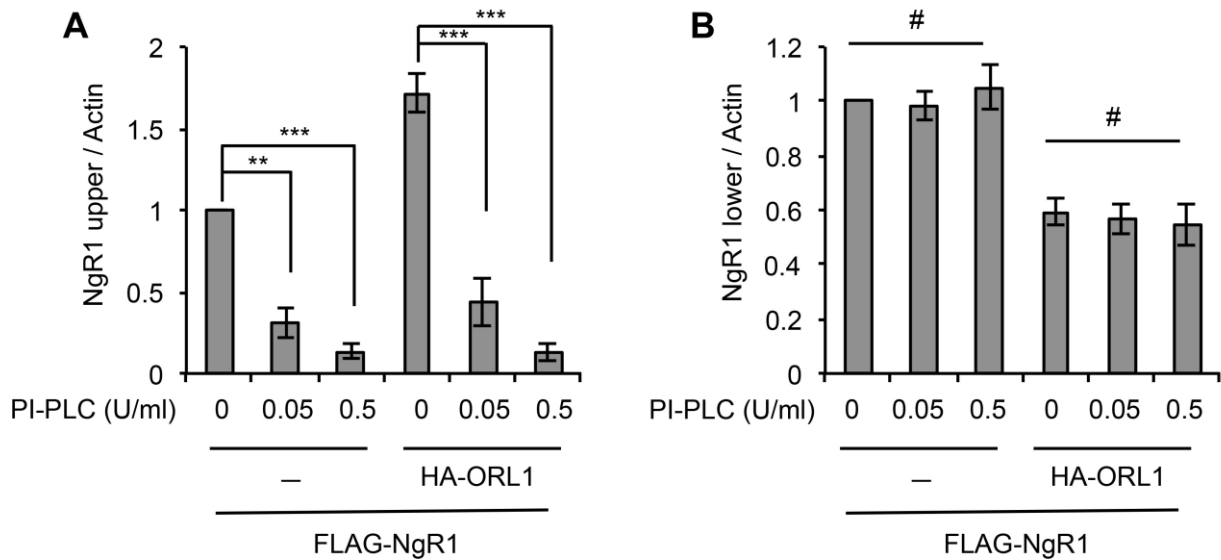

**Figure S3. Quantification of NgR1 protein in PI-PLC-treated HEK293T cells.**

(A, B) Quantification of NgR1 upper (A) or lower (B) bands normalized to Actin in Fig. 3A from three independent experiments. Mean±SE. \*\*p<0.01, \*\*\*p<0.005, #, no significant differences, one-way ANOVA followed by Tukey's test.

# Figure S4

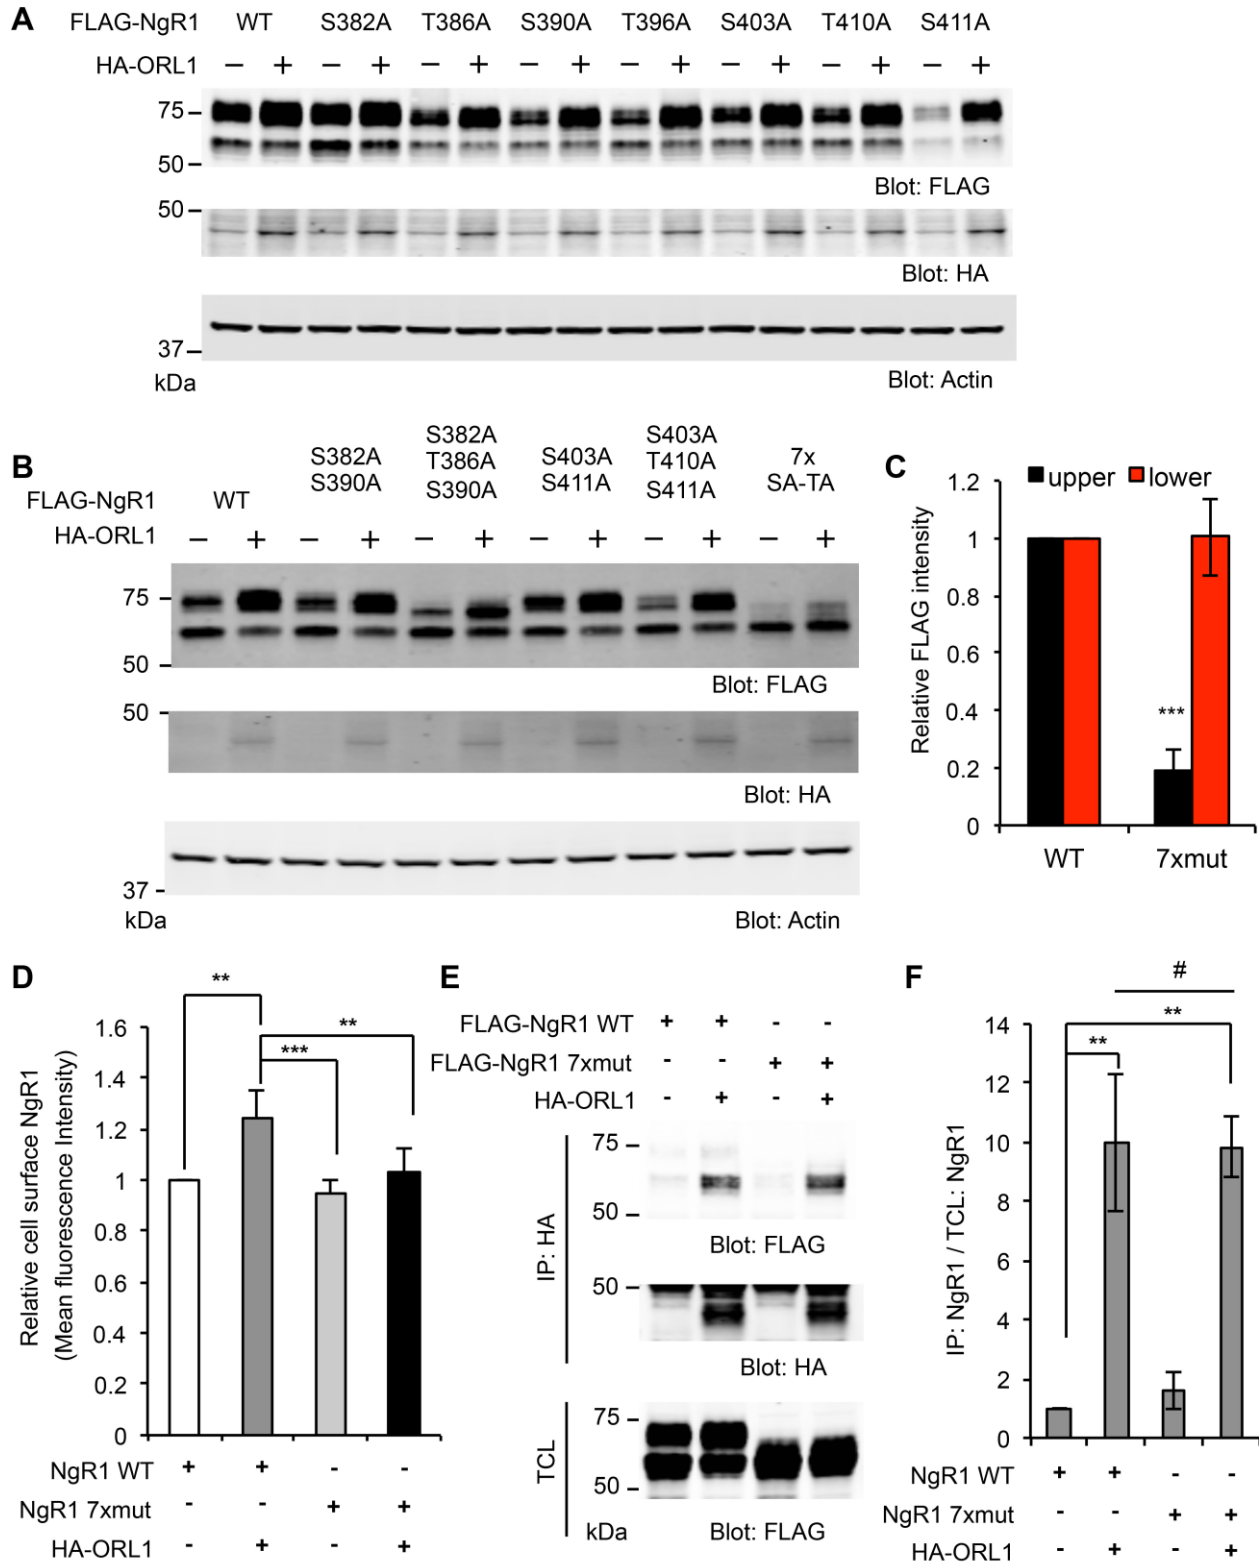

Figure S4. Identification of O-glycosylation sites in NgR1.

(A, B) HEK293T cells were transfected with FLAG-NgR1 WT, a series of FLAG-NgR1 mutants or HA-ORL1. After 36h, cells were immunoblotted for FLAG or HA. N=3 independent experiments.

(C) Quantification of NgR1 upper or lower bands normalized to Actin in FigS4A WT and 7x SA-TA mutant. Mean±SE. N=4 \*\*\*p<0.005, Student's two-tailed *t* test.

(D) HEK293T cells were transfected with FLAG-NgR1 WT, a series of FLAG-NgR1 mutants and/or HA-ORL1. After 36h, cells were stained for FLAG and analyzed by flow cytometry. The data are mean fluorescence intensity from 3 independent experiments ±SE. \*\*\*p<0.005, \*\*p<0.01, one-way ANOVA followed by Tukey's test.

(E) HEK293T cells were transfected with FLAG-NgR1 WT, FLAG-NgR1 7xmut and/or HA-ORL1. HA immunoprecipitates were blotted for FLAG and HA. N=3 independent experiments.

(F) Quantification of FLAG-NgR1 protein levels in the immunoprecipitates normalized to total cell lysate from 3 independent experiments. Mean±SE. \*\*p<0.01, #, no significant difference, one-way ANOVA followed by Tukey's test.

**Figure S5**

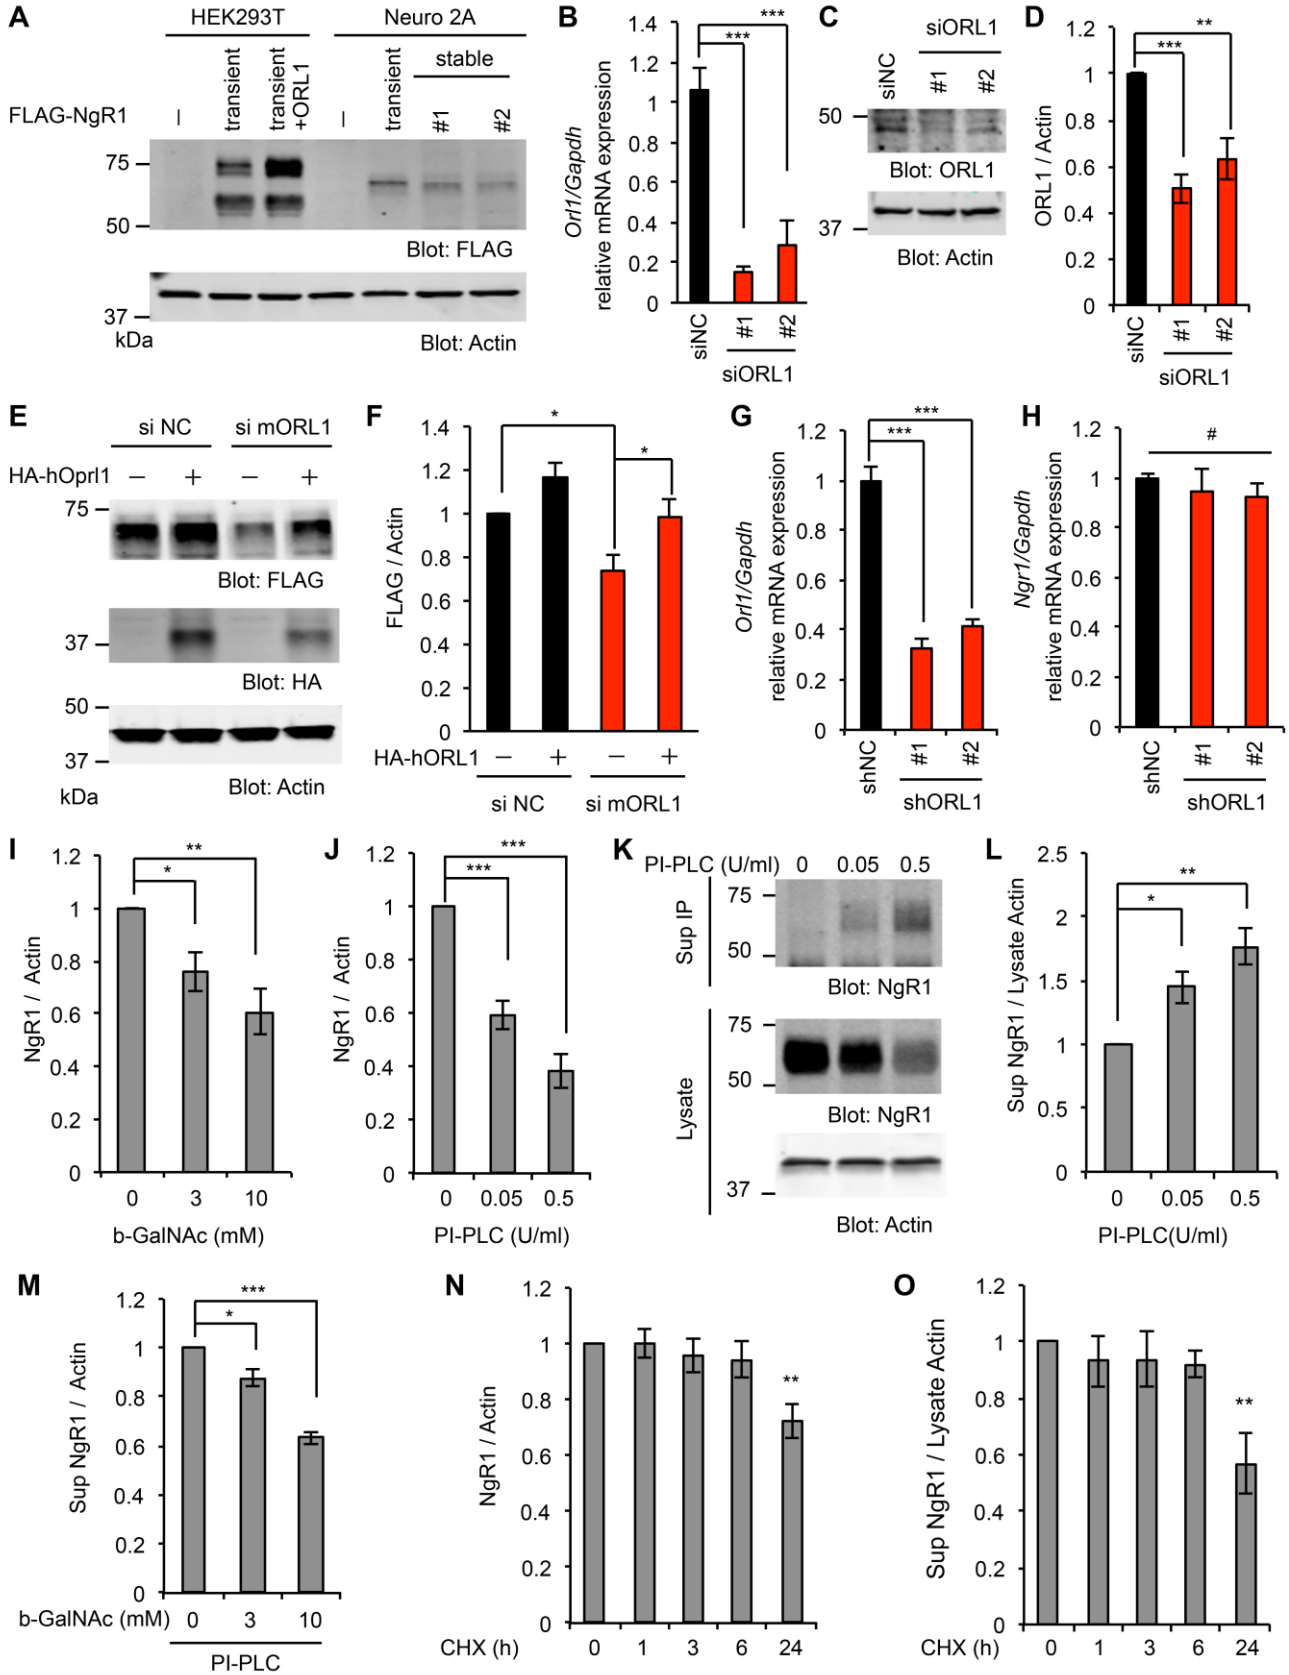

**Figure S5. Reduction of ORL1 decreases NgR1 expression in Neuro2A and neurons.**

(A) Cell lysates were collected from following cells: not transfected, transfected with FLAG-NgR1, or co-transfected with FLAG-NgR1 and HA-ORL1 in HEK293T cells; not transfected, transiently transfected with FLAG-NgR1, stably transfected FLAG-NgR1 clone #1 or clone #2 in Neuro2A cells. Lysates were immunoblotted for FLAG and Actin. N=3 independent experiments.

(B) The levels of the *ORL1* mRNA normalized to those of a *Gapdh* internal control in siRNA transfected Neuro2A cells. Mean  $\pm$ SE. N=3 independent experiments. \*\*\* $p$ <0.005, one-way ANOVA followed by Tukey's test.

(C, D) Neuro2A cells stably expressing FLAG-NgR1 were transfected with control, ORL1#1 or #2 siRNA. Cell lysates were immunoblotted for ORL1 and Actin (C). Quantification of ORL1 protein levels in the lysates normalized to Actin from 3 independent experiments (D). Mean  $\pm$ SE. \*\* $p$ <0.01, \*\*\* $p$ <0.005, one-way ANOVA followed by Tukey's test.

(E, F) Neuro2A cells stably expressing FLAG-NgR1 were transfected with control or ORL1 siRNA, and with or without HA-ORL1 plasmid. After 36h, cells were immunoblotted for FLAG and Actin (E). Quantification of FLAG-NgR1 protein levels in the lysates normalized to Actin from three independent experiments (F). Mean  $\pm$ SE. \* $p$ <0.05, one-way ANOVA followed by Tukey's test. N=6 independent experiments.

(G, H) The levels of *ORL1* (G) and *Ngr1* (H) mRNA normalized to those of a GAPDH internal control in neurons transduced with lentiviral vector for control, ORL1 shRNA#1 or #2 at 3 div for 7d. Mean  $\pm$ SE. \*\*\* $p$ <0.005, #, no significant differences, one-way ANOVA followed by Tukey's test. N=3 independent experiments.

(I, J) Quantification of NgR1 normalized to Actin from 3 independent experiments in Fig. 4I, 4J. Mean  $\pm$ SE. \* $p$ <0.05, \*\* $p$ <0.01, \*\*\* $p$ <0.005, one-way ANOVA followed by Tukey's test.

(K, L) Culture medium of cortical neurons at 10 div was replaced with PI-PLC containing medium for 1 h. NgR1 immunoprecipitates from culture medium and cell lysates were immunoblotted for NgR1 and Actin (K). Quantification of NgR1 in medium normalized to Actin from 3 independent experiments in (L). Mean $\pm$ SE. \* $p$ <0.05, \*\* $p$ <0.01, one-way ANOVA followed by Tukey's test.

(M-O) Quantification of NgR1 normalized to Actin from three independent experiments in Fig4K-4M. Mean $\pm$ SE. \* $p$ <0.05, \*\* $p$ <0.01, \*\*\* $p$ <0.005, one-way ANOVA followed by Tukey's test.



# Figure S6

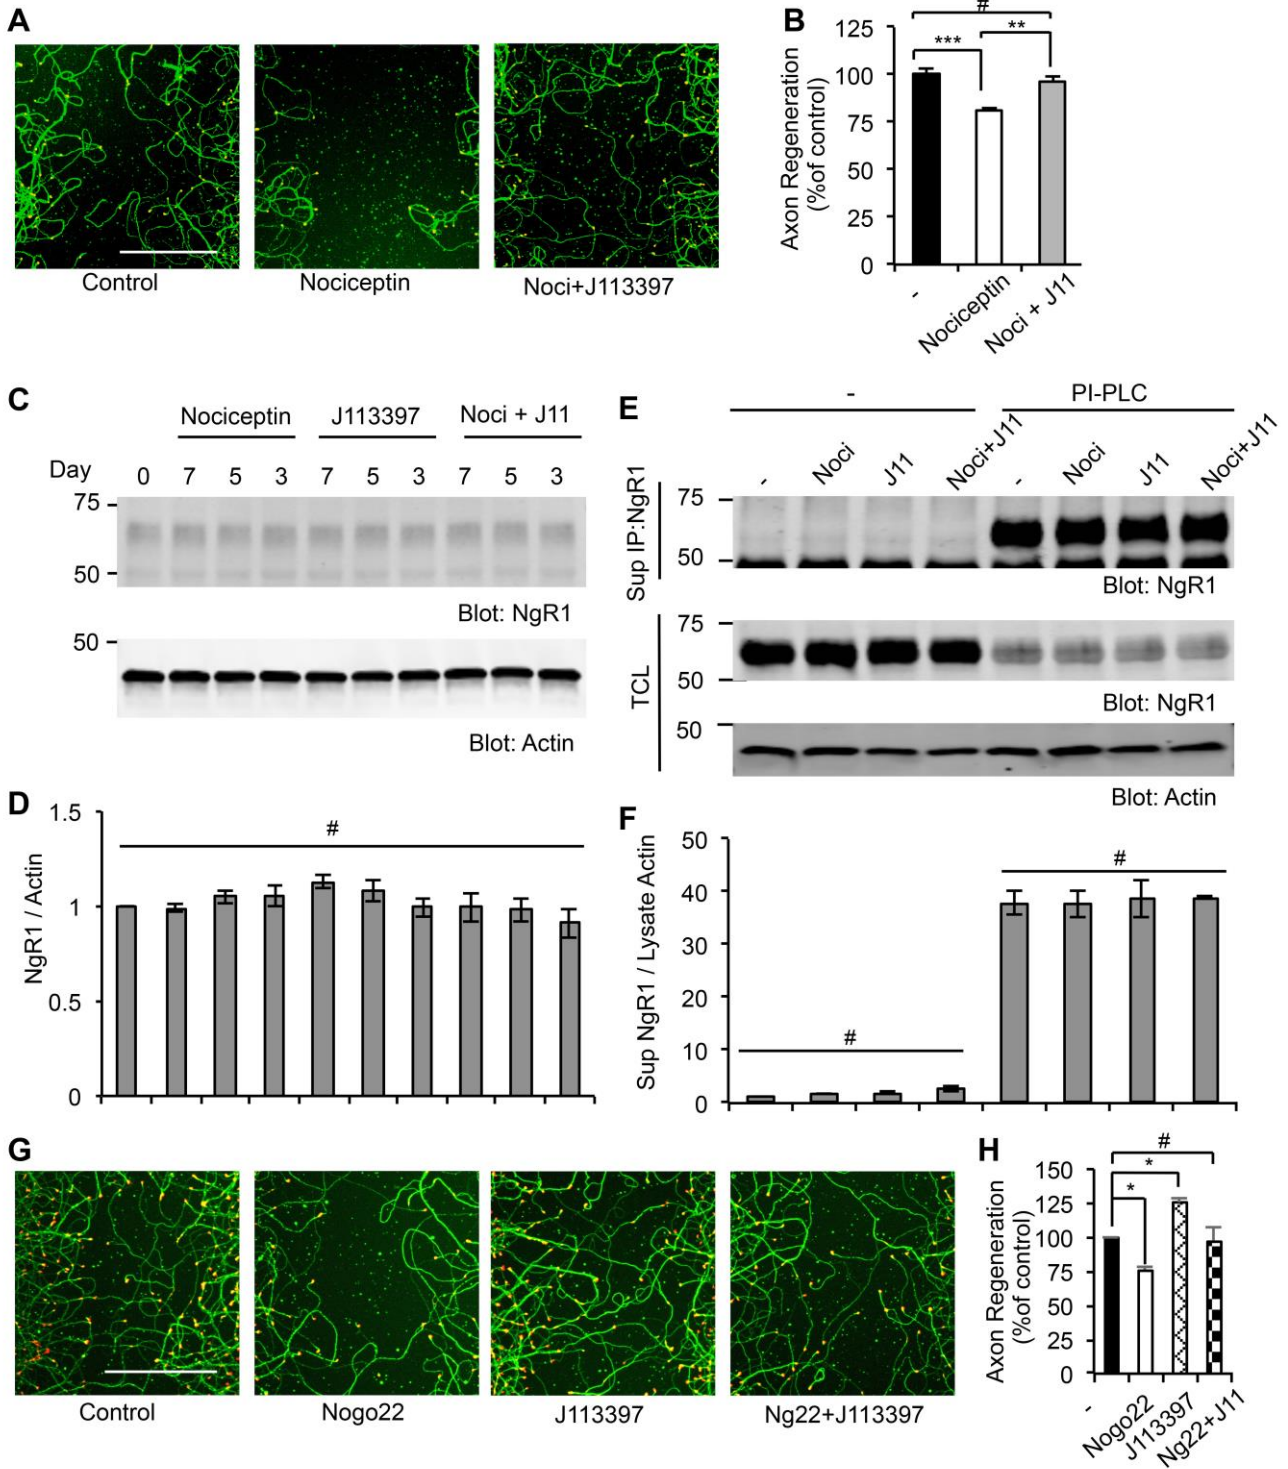

**Figure S6. Effect of J113397 on nociceptin- and Nogo-mediated inhibition of regeneration.**

(A, B) Cortical neurons were scraped and treated with vehicle, nociceptin (300 nM) or nociceptin (300 nM) + J113397 (10 nM) at 8 div for 3 days. The microphotographs show  $\beta$ III tubulin of axon (green) and phalloidin of F-actin (red) to illustrate the growth cones of cortical neurons in the middle of scraped area (A). The graph shows quantification of axon regeneration. Mean $\pm$ SE. N=5 cultures for

each group, \*\* $p < 0.01$ , \*\*\* $p < 0.005$ , #, no significant difference, one-way ANOVA followed by Tukey's test (B).

(C, D) Lysates from div21 cortical neurons treated with nociceptin (300 nM), J113397 (10 nM), or nociceptin (300 nM) + J113397 (10 nM) for indicated period were immunoblotted for NgR1 and Actin. N=3 independent experiments. Quantification of NgR1 normalized to Actin from 3 independent experiments. Mean $\pm$ SE. #, no significant differences, one-way ANOVA followed by Tukey's test.

(E, F) Div21 cortical neurons treated with nociceptin (300 nM), J113397 (10 nM), or nociceptin (300 nM) + J113397 (10 nM) for 3d were washed with culture medium and then treated with PI-PLC (1 U/ml) for 1 h. PI-PLC treated neuron culture medium was collected and immunoprecipitated with anti-NgR1 antibody and blotted for NgR1. Neurons were also harvested and lysed, then immunoblotted for NgR1 and Actin. Quantification of NgR1 in culture medium normalized to Actin from 3 independent experiments. Mean $\pm$ SE. #, no significant differences, one-way ANOVA followed by Tukey's test.

(G, H) Cortical neurons were scraped and treated with vehicle, Nogo22 (100 nM), nociceptin (300 nM) or Nogo22 (100 nM) + nociceptin (300 nM) at 8 div for 3 days. The microphotographs show  $\beta$ III tubulin of axon (green) and phalloidin of F-actin (red) to illustrate the growth cones of cortical neurons in the middle of scraped area (G). The graph shows quantification of axon regeneration. Mean $\pm$ SE. N=3 cultures for each group, \* $p < 0.05$ , #, no significant difference, one-way ANOVA followed by Tukey's test (H).

## Figure S7

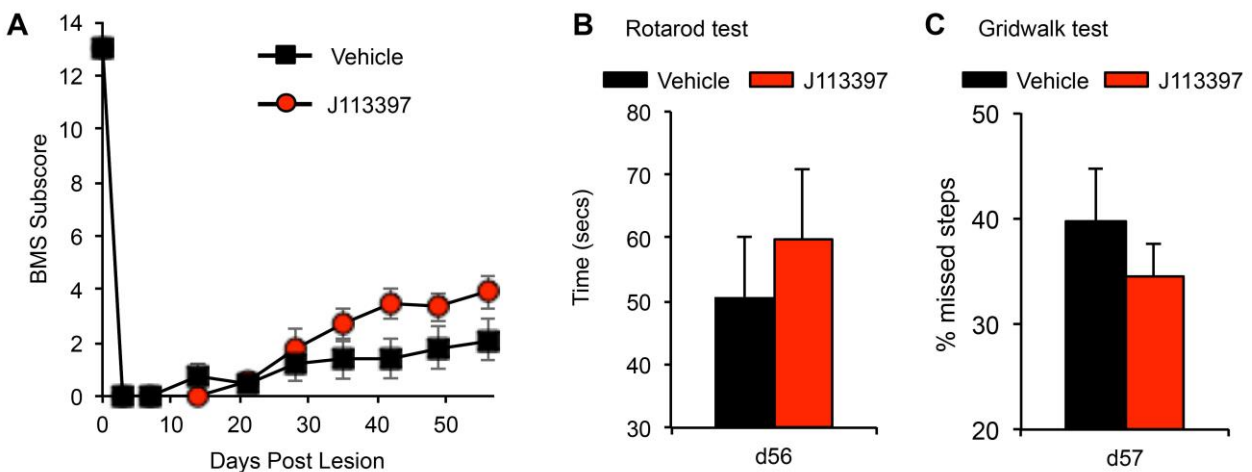

### Figure S7. Motor performance after SCI and J113397 treatment.

(A to C) Open-field locomotion performance as assessed by the BMS subscore (A) of vehicle and J113397 injected mice. Mean $\pm$ SE. N=10 vehicle-injected mice and n=9 J113397-injected mice. RotaRod performance (B) and gridwalk test (C) of vehicle and J113397 treated animals on the indicated day after injury.

## Figure S8

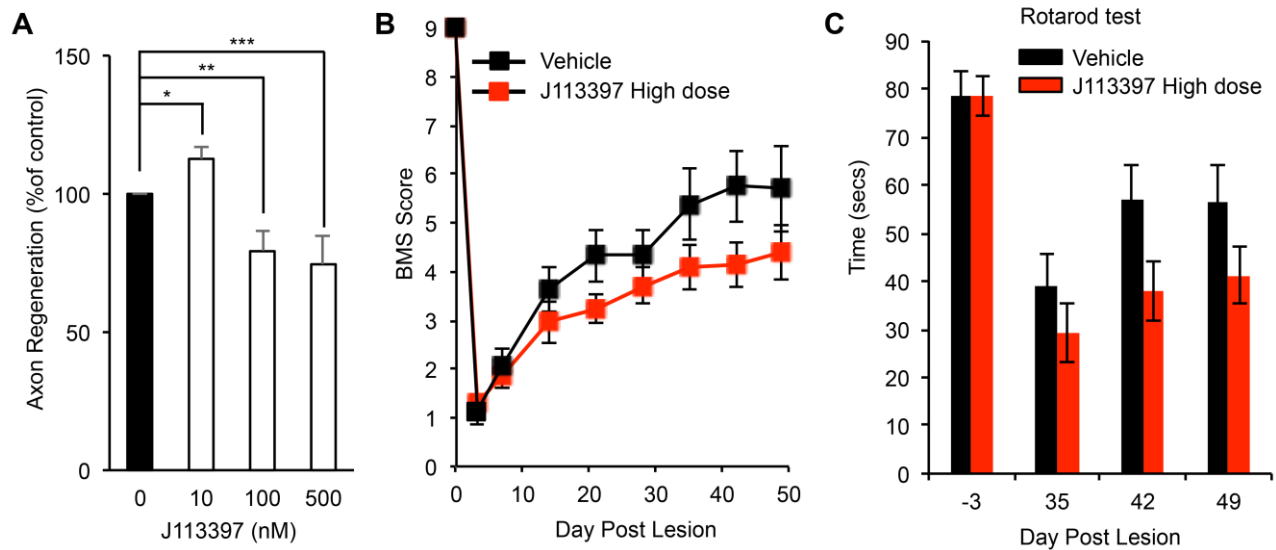

### Figure S8. Effect of high-dose J113397.

(A) Cortical neurons were scraped and treated with indicated amount of J113397 starting at 8 div for 3 days. The graph reports the extent of axon regeneration. Mean $\pm$ SE. N=4 biological replicates, \* $p$ <0.05, \*\* $p$ <0.01, \*\*\* $p$ <0.005, one-way ANOVA followed by Dunnett's test.

(B) Open-field locomotion performance is assessed by the BMS for WT mice after T7 dorsal over-hemisection and treatment with vehicle or high dose J113397 (2 mg/kg/day). Mean $\pm$ SE. N=12 mice in each group. No significant difference between groups by repeated measures one-way ANOVA.

(C) Rotarod test at the indicated days after T7 dorsal over-hemisection for the same group as in B. Mean $\pm$ SE. N=12 mice in each group. No significant differences between treatment groups, Student's two-tailed  $t$  test at each time point.

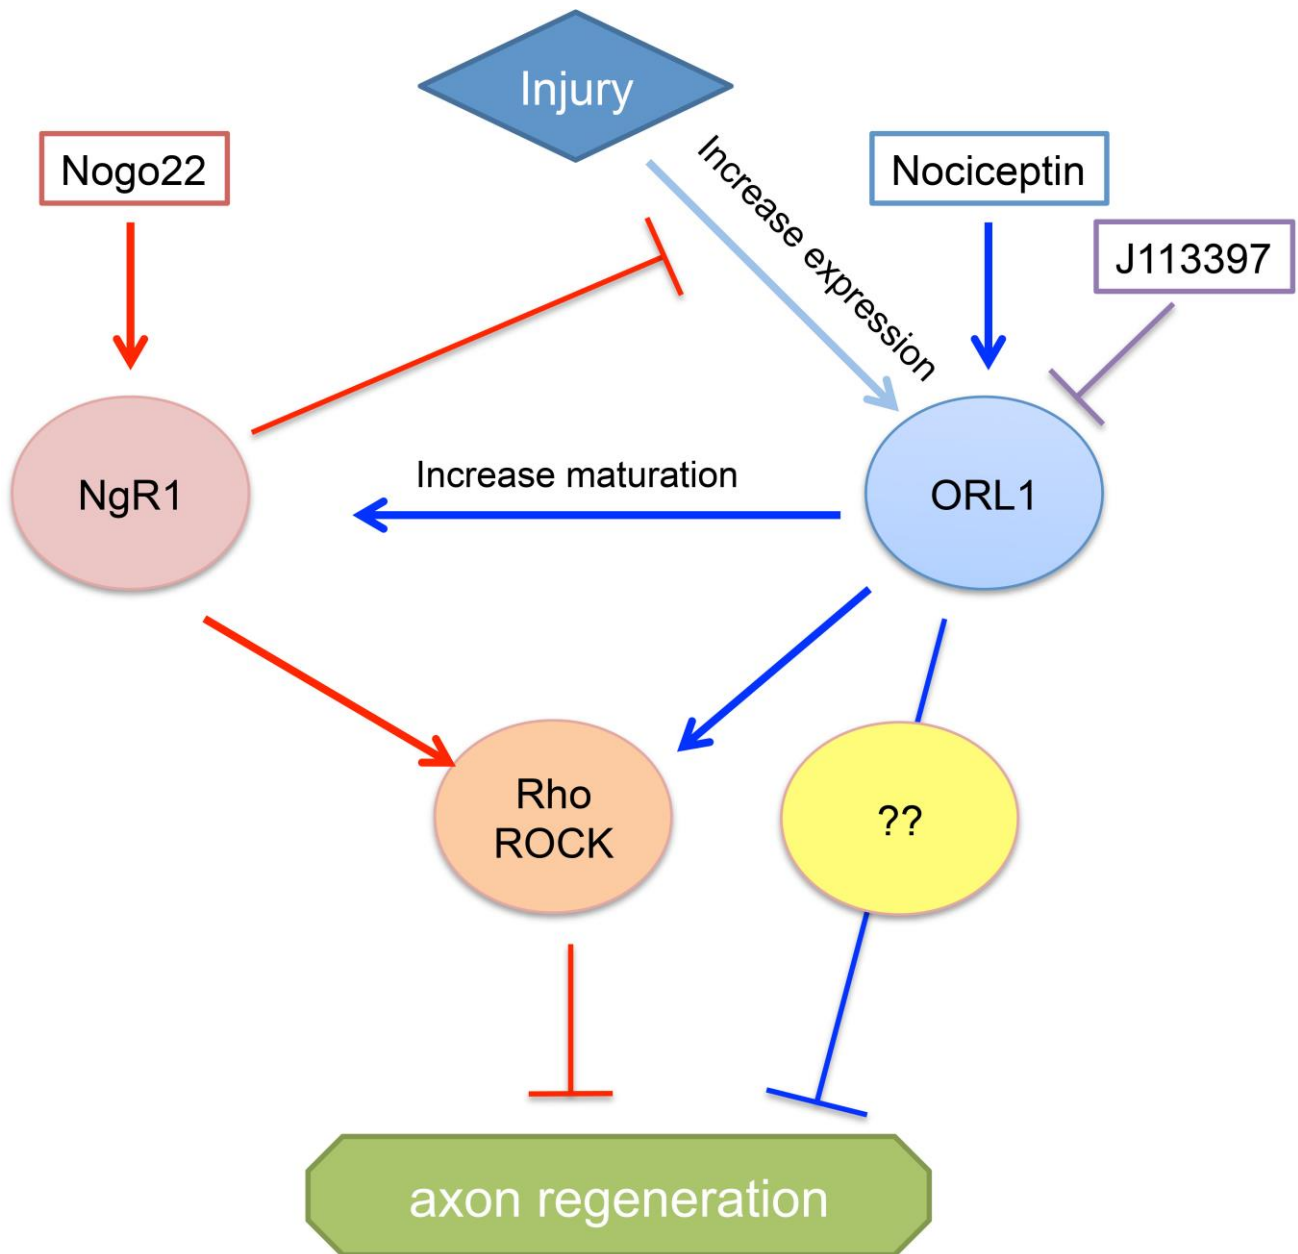

**Figure S9. Model for nociception/ORL1-mediated regulation of neural repair in relation to NgR1.** After spinal cord injury *ORL1* mRNA is increased in the background of *Ngr1* deficiency. NgR1 maturation is increased by ORL1 through O-linked glycosylation. ORL1 enhances O-linked glycosylation of NgR1 that results in increased NgR1 surface expression. Nogo/NgR1 and Nociceptin/ORL1 signaling through Rho/ROCK pathway suppress axonal regeneration. The ORL1 antagonist J113397 inhibits Nociceptin/ORL1-mediated suppression of axon regeneration.

**Table S1. Gene expression in brainstem after SCI in *Ngr1*<sup>-/-</sup> and *Ngr1*<sup>+/-</sup> mice.**

Brain stem tissue was collected 4 days after mid-thoracic spinal dorsal hemisection injury of *Ngr1*<sup>-/-</sup> and *Ngr1*<sup>+/-</sup> adult mice. Mean gene expression level was determined by hybridization of biotinylated cRNA prepared from Trizol-extracted total RNA to Affymetrix genechips for 2 mice of each genotype. Mean expression values for each genotype were filtered for those values greater than 200. Differences between genotypes were filtered for those values greater than 2-fold and  $p < 0.05$  by Student's two-tailed *t* test between genotypes without correction for multiple gene tests. The mean expression level for 87 genes with increased expression and 97 genes with decreased expression meeting these criteria are listed. The full data set is available at the Mendeley website (<https://data.mendeley.com>, doi:10.17632/d5cz46zv8z.1).

**Genes with increased expression in *Ngr1*<sup>-/-</sup> mice**

| Affy ID     | Description                                                                                                                                      | <i>Ngr1</i> <sup>-/-</sup> | <i>Ngr1</i> <sup>+/-</sup> | Fold change |
|-------------|--------------------------------------------------------------------------------------------------------------------------------------------------|----------------------------|----------------------------|-------------|
| 168328_i_at | opioid receptor-like                                                                                                                             | 5726                       | 706                        | 8.11        |
| 164205_at   | RIKEN cDNA 1110014F12 gene                                                                                                                       | 1329                       | 208                        | 6.38        |
| 104949_at   | RIKEN cDNA E230026N22 gene                                                                                                                       | 1978                       | 409                        | 4.83        |
| 109353_at   | RIKEN cDNA 2310043K02 gene                                                                                                                       | 1601                       | 332                        | 4.82        |
| 163272_at   | tripartite motif protein 12                                                                                                                      | 996                        | 212                        | 4.70        |
| 166509_r_at | neoplastic progression 3                                                                                                                         | 17895                      | 4397                       | 4.07        |
| 109933_at   | RIKEN cDNA 1110028C15 gene                                                                                                                       | 1021                       | 252                        | 4.05        |
| 113334_at   | C lectin-related protein A                                                                                                                       | 893                        | 222                        | 4.02        |
| 112658_at   | heparanase                                                                                                                                       | 1047                       | 263                        | 3.98        |
| 133062_r_at |                                                                                                                                                  | 1052                       | 270                        | 3.90        |
| 108871_at   | RIKEN cDNA 6330549H03 gene                                                                                                                       | 1290                       | 346                        | 3.73        |
| 116181_at   | RIKEN cDNA 5730512J02 gene                                                                                                                       | 1407                       | 401                        | 3.51        |
| 117227_at   | Mus musculus transcribed sequences                                                                                                               | 1737                       | 502                        | 3.46        |
| 167688_f_at | malonyl-CoA decarboxylase                                                                                                                        | 2249                       | 666                        | 3.38        |
| 168350_f_at | RIKEN cDNA 5930403L14 gene                                                                                                                       | 838                        | 249                        | 3.37        |
| 107767_at   | peroxiredoxin 1                                                                                                                                  | 870                        | 262                        | 3.32        |
| 166185_at   | Mus musculus transcribed sequence with moderate similarity to protein ref:NP_080533.1 (M.musculus) RIKEN cDNA 4930506L07 [Mus musculus]          | 1284                       | 388                        | 3.31        |
| 135786_at   | Mus musculus transcribed sequences                                                                                                               | 862                        | 261                        | 3.30        |
| 115304_at   | Mus musculus transcribed sequences                                                                                                               | 1152                       | 357                        | 3.23        |
| 115205_at   | Mus musculus 0 day neonate thymus cDNA, RIKEN full-length enriched library, clone:A430093F15 product:hypothetical protein, full insert sequence. | 840                        | 260                        | 3.23        |
| 171517_at   |                                                                                                                                                  | 3090                       | 979                        | 3.16        |
| 107869_at   | DNA segment, Chr 4, ERATO Doi 681, expressed                                                                                                     | 3508                       | 1156                       | 3.03        |
| 105145_at   | RIKEN cDNA A530058N18 gene                                                                                                                       | 688                        | 227                        | 3.03        |

|             |                                                                                                                                                                                                       |       |      |      |
|-------------|-------------------------------------------------------------------------------------------------------------------------------------------------------------------------------------------------------|-------|------|------|
| 112384_at   | RIKEN cDNA 9830169G11 gene                                                                                                                                                                            | 2097  | 703  | 2.98 |
| 95896_at    | cytochrome c oxidase, subunit VIIC                                                                                                                                                                    | 701   | 239  | 2.94 |
| 108884_at   | Mus musculus, Similar to RIKEN cDNA 1700067C01 gene, clone MGC:31405 IMAGE:4456622, mRNA, complete cds                                                                                                | 660   | 226  | 2.92 |
| 163222_at   | RIKEN cDNA 1300019C06 gene                                                                                                                                                                            | 618   | 215  | 2.88 |
| 136558_at   | RIKEN cDNA 1810026B05 gene                                                                                                                                                                            | 4030  | 1403 | 2.87 |
| 128811_at   | SNF related kinase                                                                                                                                                                                    | 667   | 237  | 2.82 |
| 102021_at   | interleukin 4 receptor, alpha                                                                                                                                                                         | 782   | 277  | 2.82 |
| 95184_f_at  |                                                                                                                                                                                                       | 1607  | 576  | 2.79 |
| 164760_f_at | RIKEN cDNA 2510003D18 gene                                                                                                                                                                            | 791   | 284  | 2.78 |
| 168053_f_at | RIKEN cDNA 3110052F15 gene                                                                                                                                                                            | 4072  | 1465 | 2.78 |
| 107291_at   | zinc finger protein 131                                                                                                                                                                               | 1022  | 372  | 2.75 |
| 170233_at   | HLA-B associated transcript 4                                                                                                                                                                         | 1749  | 639  | 2.74 |
| 167230_f_at | annexin A4                                                                                                                                                                                            | 2050  | 762  | 2.69 |
| 163269_at   | SMC (structural maintenance of chromosomes 1)-like 1 (S. cerevisiae)                                                                                                                                  | 1577  | 593  | 2.66 |
| 116177_at   | regulator of G-protein signaling 12                                                                                                                                                                   | 1607  | 608  | 2.64 |
| 99664_at    | pericentrin 2                                                                                                                                                                                         | 607   | 230  | 2.64 |
| 102069_at   | metal response element binding transcription factor 2                                                                                                                                                 | 2871  | 1089 | 2.64 |
| 162786_r_at | secretory carrier membrane protein 4                                                                                                                                                                  | 1047  | 397  | 2.63 |
| 166483_at   | Mus musculus transcribed sequence with strong similarity to protein ref:NP_071338.1 (H.sapiens) potassium channel, subfamily K, member 12; tandem pore domain potassium channel THIK-2 [Homo sapiens] | 7174  | 2737 | 2.62 |
| 170608_at   | hypothetical protein MGC27683                                                                                                                                                                         | 1609  | 618  | 2.60 |
| 114517_at   | glutamate receptor interacting protein 1                                                                                                                                                              | 1150  | 447  | 2.57 |
| 111466_at   | Mus musculus transcribed sequence with moderate similarity to protein pir:T17319 (H.sapiens) T17319 hypothetical protein DKFZp434N178.1 - human (fragment)                                            | 596   | 232  | 2.57 |
| 111119_at   | salvador homolog 1 (Drosophila)                                                                                                                                                                       | 736   | 290  | 2.54 |
| 95395_at    | RIKEN cDNA 9130022A11 gene                                                                                                                                                                            | 828   | 328  | 2.52 |
| 113788_at   | cysteine-rich motor neuron 1                                                                                                                                                                          | 2439  | 967  | 2.52 |
| 116114_at   | DNA segment, Chr 11, ERATO Doi 498, expressed                                                                                                                                                         | 530   | 211  | 2.51 |
| 134226_r_at | RIKEN cDNA 2900024O10 gene                                                                                                                                                                            | 636   | 257  | 2.47 |
| 168457_i_at | natriuretic peptide precursor type C                                                                                                                                                                  | 1446  | 587  | 2.46 |
| 166930_at   | CTF18, chromosome transmission fidelity factor 18 homolog (S. cerevisiae)                                                                                                                             | 22705 | 9359 | 2.43 |
| 160613_at   | lipocalin 7                                                                                                                                                                                           | 927   | 384  | 2.41 |
| 133717_at   |                                                                                                                                                                                                       | 2360  | 980  | 2.41 |

|             |                                                                                                                                                                                             |       |       |      |
|-------------|---------------------------------------------------------------------------------------------------------------------------------------------------------------------------------------------|-------|-------|------|
| 100980_at   | Rho-associated coiled-coil forming kinase 1                                                                                                                                                 | 1024  | 425   | 2.41 |
| 115231_at   | Casitas B-lineage lymphoma-like 1                                                                                                                                                           | 960   | 405   | 2.37 |
| 129165_at   | Mus musculus 18-day embryo whole body cDNA, RIKEN full-length enriched library, clone:1110066J06 product:unclassifiable, full insert sequence.                                              | 882   | 372   | 2.37 |
| 139034_at   | RIKEN cDNA 1110033E03 gene                                                                                                                                                                  | 7363  | 3134  | 2.35 |
| 106142_at   | adenylate cyclase 5                                                                                                                                                                         | 507   | 226   | 2.24 |
| 100412_g_at | AE binding protein 1                                                                                                                                                                        | 1225  | 546   | 2.24 |
| 134067_r_at | inhibitor of growth family, member 3                                                                                                                                                        | 1283  | 574   | 2.23 |
| 116357_at   |                                                                                                                                                                                             | 2129  | 964   | 2.21 |
| 102307_at   | doublecortin                                                                                                                                                                                | 1091  | 494   | 2.21 |
| 168311_f_at | eukaryotic translation initiation factor 2B, subunit 4 delta                                                                                                                                | 40480 | 18536 | 2.18 |
| 166258_at   | RIKEN cDNA 2900084M21 gene                                                                                                                                                                  | 7900  | 3627  | 2.18 |
| 94192_at    | ganglioside-induced differentiation-associated-protein 10                                                                                                                                   | 1118  | 515   | 2.17 |
| 104327_at   | RIKEN cDNA 9030612M13 gene                                                                                                                                                                  | 3398  | 1569  | 2.17 |
| 109351_r_at | T-cell activation kelch repeat protein                                                                                                                                                      | 533   | 247   | 2.16 |
| 167449_f_at | DnaJ (Hsp40) homolog, subfamily B, member 10                                                                                                                                                | 17097 | 7961  | 2.15 |
| 138511_at   | Mus musculus adult male diencephalon cDNA, RIKEN full-length enriched library, clone:9330161H13 product:TRANSCRIPTION FACTOR XLMO1 homolog [ <i>Xenopus laevis</i> ], full insert sequence. | 1861  | 867   | 2.15 |
| 102132_i_at | alkaline phosphatase 5                                                                                                                                                                      | 919   | 428   | 2.15 |
| 130718_at   | tissue inhibitor of metalloproteinase 4                                                                                                                                                     | 53790 | 25440 | 2.11 |
| 100751_at   | a disintegrin and metalloprotease domain 10                                                                                                                                                 | 1615  | 766   | 2.11 |
| 133864_r_at | oxysterol binding protein-like 6                                                                                                                                                            | 909   | 434   | 2.10 |
| 93853_at    | RIKEN cDNA 2010306G19 gene                                                                                                                                                                  | 1855  | 885   | 2.10 |
| 109344_at   | cDNA sequence BC031748                                                                                                                                                                      | 3167  | 1523  | 2.08 |
| 116629_at   | RIKEN cDNA 4832412D13 gene                                                                                                                                                                  | 3754  | 1814  | 2.07 |
| 137180_at   | RIKEN cDNA 1500009C09 gene                                                                                                                                                                  | 15861 | 7719  | 2.05 |
| 100706_f_at | Scm-related gene containing four mbt domain 2                                                                                                                                               | 472   | 230   | 2.05 |
| 166469_f_at | sepiapterin reductase                                                                                                                                                                       | 37714 | 18385 | 2.05 |
| 105657_at   | Mus musculus adult male hypothalamus cDNA, RIKEN full-length enriched library, clone:A230095J21 product:unknown EST, full insert sequence.                                                  | 1720  | 844   | 2.04 |
| 99874_at    | RAP2B, member of RAS oncogene family                                                                                                                                                        | 490   | 241   | 2.03 |
| 114481_at   | alkylglycerone phosphate synthase                                                                                                                                                           | 1842  | 906   | 2.03 |
| 167421_at   | ectonucleotide pyrophosphatase/phosphodiesterase 5                                                                                                                                          | 24101 | 11866 | 2.03 |
| 104125_at   | Hoxa1 regulated gene                                                                                                                                                                        | 2059  | 1016  | 2.03 |
| 105102_at   | RIKEN cDNA 2410085M17 gene                                                                                                                                                                  | 1441  | 712   | 2.02 |

|           |                                                 |     |     |      |
|-----------|-------------------------------------------------|-----|-----|------|
| 161457_at | cell division cycle 2 homolog (S. pombe)-like 2 | 404 | 202 | 2.00 |
|-----------|-------------------------------------------------|-----|-----|------|

**Genes with decreased expression in *Ngr1*<sup>-/-</sup> mice**

| Affy ID     | Description                                                                                                                                                                                            | Rtn4r-/- | Rtn4r+/- | Fold change |
|-------------|--------------------------------------------------------------------------------------------------------------------------------------------------------------------------------------------------------|----------|----------|-------------|
| 163780_at   | RIKEN cDNA 2610511E22 gene                                                                                                                                                                             | 241      | 1848     | 0.13        |
| 132030_at   | Mus musculus transcribed sequence with weak similarity to protein sp:O00268 (H.sapiens) T2D3_HUMAN Transcription initiation factor TFIID 135 kDa subunit (TAFII-135) (TAFII135) (TAFII-130) (TAFII130) | 377      | 2564     | 0.15        |
| 130656_at   | Mus musculus transcribed sequences                                                                                                                                                                     | 257      | 1441     | 0.18        |
| 115791_at   | RIKEN cDNA 4932702F08 gene                                                                                                                                                                             | 824      | 4479     | 0.18        |
| 101741_at   |                                                                                                                                                                                                        | 3424     | 18481    | 0.19        |
| 166167_f_at | serine/threonine protein kinase SSTK                                                                                                                                                                   | 205      | 1091     | 0.19        |
| 170471_i_at | ferritin, heavy polypeptide-like 17                                                                                                                                                                    | 216      | 1113     | 0.19        |
| 138551_at   | Mus musculus transcribed sequences                                                                                                                                                                     | 449      | 2088     | 0.22        |
| 129004_at   | Mus musculus transcribed sequences                                                                                                                                                                     | 250      | 1126     | 0.22        |
| 133032_at   | Mus musculus transcribed sequences                                                                                                                                                                     | 558      | 2436     | 0.23        |
| 171281_at   | COP9 (constitutive photomorphogenic) homolog, subunit 7a (Arabidopsis thaliana)                                                                                                                        | 234      | 999      | 0.23        |
| 137544_at   | Mus musculus transcribed sequences                                                                                                                                                                     | 232      | 973      | 0.24        |
| 130564_at   | Mus musculus transcribed sequences                                                                                                                                                                     | 232      | 953      | 0.24        |
| 171246_at   | Mus musculus adult male testis cDNA, RIKEN full-length enriched library, clone:4930405O22 product:unknown EST, full insert sequence.                                                                   | 626      | 2521     | 0.25        |
| 115389_at   | RIKEN cDNA 2310012I10 gene                                                                                                                                                                             | 498      | 1992     | 0.25        |
| 167341_r_at | aspartate-beta-hydroxylase                                                                                                                                                                             | 218      | 869      | 0.25        |
| 114867_at   | RIKEN cDNA 3632431M01 gene                                                                                                                                                                             | 386      | 1489     | 0.26        |
| 160868_at   | RAB3B, member RAS oncogene family                                                                                                                                                                      | 457      | 1743     | 0.26        |
| 138115_at   | Mus musculus transcribed sequences                                                                                                                                                                     | 202      | 770      | 0.26        |
| 135289_at   | Mus musculus transcribed sequence                                                                                                                                                                      | 586      | 2212     | 0.26        |
| 169155_f_at | RIKEN cDNA 4930403L05 gene                                                                                                                                                                             | 312      | 1166     | 0.27        |
| 171445_i_at | proliferin related protein                                                                                                                                                                             | 561      | 2056     | 0.27        |
| 114793_at   | RIKEN cDNA B830029I03 gene                                                                                                                                                                             | 1213     | 4342     | 0.28        |
| 103651_r_at | Mus musculus RIKEN cDNA 1110031C13 gene, mRNA (cDNA clone MGC:18965 IMAGE:3986466), complete cds                                                                                                       | 651      | 2220     | 0.29        |
| 112397_at   | Mus musculus nuclear cap binding protein subunit 1, 80kDa, mRNA (cDNA clone IMAGE:6402922)                                                                                                             | 660      | 2232     | 0.30        |
| 164183_at   | RIKEN cDNA 2610318O14 gene                                                                                                                                                                             | 346      | 1170     | 0.30        |



|             |                                                                                                                                                   |      |      |      |
|-------------|---------------------------------------------------------------------------------------------------------------------------------------------------|------|------|------|
| 117333_at   | RIKEN cDNA 2810417J12 gene                                                                                                                        | 650  | 2169 | 0.30 |
| 134146_at   |                                                                                                                                                   | 265  | 880  | 0.30 |
| 169547_at   | methyltransferase-like 3                                                                                                                          | 363  | 1172 | 0.31 |
| 130168_at   | Mus musculus transcribed sequence                                                                                                                 | 276  | 876  | 0.32 |
| 111615_at   | inhibitor of kappaB kinase beta                                                                                                                   | 908  | 2882 | 0.32 |
| 107119_at   | FAD-synthetase                                                                                                                                    | 1589 | 4998 | 0.32 |
| 170055_at   | replication protein A1                                                                                                                            | 344  | 1079 | 0.32 |
| 134552_f_at | RIKEN cDNA 1700101O05 gene                                                                                                                        | 277  | 857  | 0.32 |
| 169292_r_at | Mus musculus, clone IMAGE:4505796, mRNA                                                                                                           | 381  | 1173 | 0.33 |
| 169926_at   | oxidase assembly 1-like                                                                                                                           | 441  | 1349 | 0.33 |
| 161648_at   | complement receptor related protein                                                                                                               | 333  | 1017 | 0.33 |
| 171359_at   | RIKEN cDNA 2610209L14 gene                                                                                                                        | 1164 | 3511 | 0.33 |
| 129340_at   |                                                                                                                                                   | 226  | 680  | 0.33 |
| 133213_at   | Mus musculus transcribed sequences                                                                                                                | 1148 | 3448 | 0.33 |
| 109062_f_at | PET112-like (yeast)                                                                                                                               | 702  | 2082 | 0.34 |
| 168055_at   | Mus musculus, clone IMAGE:6742657, mRNA                                                                                                           | 295  | 857  | 0.34 |
| 113811_at   | calcitonin-related polypeptide, beta                                                                                                              | 375  | 1076 | 0.35 |
| 134139_r_at | Mus musculus mRNA similar to hypothetical protein FLJ20265 (cDNA clone IMAGE:5010465)                                                             | 230  | 655  | 0.35 |
| 165483_at   | apoptosis regulator BCL-G                                                                                                                         | 730  | 2045 | 0.36 |
| 104959_at   | Mus musculus zinc finger protein 422, mRNA (cDNA clone MGC:57971 IMAGE:5709349), complete cds                                                     | 384  | 1049 | 0.37 |
| 130137_at   |                                                                                                                                                   | 445  | 1205 | 0.37 |
| 169506_r_at | RIKEN cDNA 1110019N10 gene                                                                                                                        | 1334 | 3609 | 0.37 |
| 116702_at   | Mus musculus 12 days embryo spinal ganglion cDNA, RIKEN full-length enriched library, clone:D130092A12 product:unknown EST, full insert sequence. | 417  | 1120 | 0.37 |
| 134285_at   | RIKEN cDNA 5930430L01 gene                                                                                                                        | 217  | 582  | 0.37 |
| 92666_at    | SH3-domain binding protein 1                                                                                                                      | 1430 | 3804 | 0.38 |
| 170867_r_at |                                                                                                                                                   | 211  | 562  | 0.38 |
| 137106_at   | Mus musculus transcribed sequence with moderate similarity to protein pir:S12207 (M.musculus) S12207 hypothetical protein (B2 element) - mouse    | 451  | 1193 | 0.38 |
| 169470_at   |                                                                                                                                                   | 328  | 866  | 0.38 |
| 134714_at   | Mus musculus transcribed sequences                                                                                                                | 260  | 686  | 0.38 |
| 167140_at   | RIKEN cDNA 1810035K13 gene                                                                                                                        | 840  | 2209 | 0.38 |
| 137195_i_at | RIKEN cDNA 4921507I02 gene                                                                                                                        | 453  | 1188 | 0.38 |
| 129150_at   | Mus musculus transcribed sequences                                                                                                                | 494  | 1290 | 0.38 |

|             |                                                                                                                                          |      |       |      |
|-------------|------------------------------------------------------------------------------------------------------------------------------------------|------|-------|------|
| 140642_at   | Mus musculus transcribed sequences                                                                                                       | 833  | 2109  | 0.39 |
| 135737_r_at |                                                                                                                                          | 240  | 605   | 0.40 |
| 116393_at   | Mus musculus transcribed sequences                                                                                                       | 757  | 1861  | 0.41 |
| 130439_at   | hypothetical protein MGC49274                                                                                                            | 1028 | 2521  | 0.41 |
| 137736_at   |                                                                                                                                          | 847  | 2072  | 0.41 |
| 164572_s_at | RIKEN cDNA 1190001I08 gene                                                                                                               | 3448 | 8394  | 0.41 |
| 111590_at   | RIKEN cDNA 1500004O14 gene                                                                                                               | 768  | 1867  | 0.41 |
| 102267_at   | UDP-Gal:betaGalNAc beta 1,3-galactosyltransferase, polypeptide 4                                                                         | 256  | 621   | 0.41 |
| 136253_at   | Mus musculus transcribed sequences                                                                                                       | 227  | 550   | 0.41 |
| 134199_at   | Mus musculus 3 days neonate thymus cDNA, RIKEN full-length enriched library, clone:A630031F24 product:unknown EST, full insert sequence. | 235  | 562   | 0.42 |
| 166969_at   | Mus musculus transcribed sequences                                                                                                       | 259  | 612   | 0.42 |
| 170630_at   | apoptotic chromatin condensation inducer in the nucleus                                                                                  | 433  | 1021  | 0.42 |
| 167691_at   | Mus musculus transcribed sequence with weak similarity to protein ref:NP_002411.1 (H.sapiens) melastatin 1 [Homo sapiens]                | 321  | 748   | 0.43 |
| 117208_at   | RIKEN cDNA 1110003O08 gene                                                                                                               | 5242 | 12201 | 0.43 |
| 113705_at   | DNA segment, Chr 4, ERATO Doi 22, expressed                                                                                              | 1271 | 2889  | 0.44 |
| 113231_at   | RIKEN cDNA 1700123O20 gene                                                                                                               | 1935 | 4396  | 0.44 |
| 160836_at   | sema domain, immunoglobulin domain (Ig), transmembrane domain (TM) and short cytoplasmic domain, (semaphorin) 4D                         | 1053 | 2389  | 0.44 |
| 130311_at   | RIKEN cDNA E130314N14 gene                                                                                                               | 1026 | 2310  | 0.44 |
| 169093_i_at | Mus musculus transcribed sequence                                                                                                        | 756  | 1693  | 0.45 |
| 163662_at   | mitogen-activated protein kinase kinase kinase 7 interacting protein 1                                                                   | 1091 | 2425  | 0.45 |
| 165738_r_at | RIKEN cDNA 2010007L18 gene                                                                                                               | 345  | 766   | 0.45 |
| 137722_at   | RIKEN cDNA A930015B13 gene                                                                                                               | 439  | 967   | 0.45 |
| 170768_at   | enhancer of rudimentary homolog (Drosophila)                                                                                             | 580  | 1273  | 0.46 |
| 170924_f_at | proteasome (prosome, macropain) inhibitor subunit 1                                                                                      | 1155 | 2498  | 0.46 |
| 163015_at   | amionless                                                                                                                                | 1707 | 3690  | 0.46 |
| 109982_at   | fos-like antigen 2                                                                                                                       | 818  | 1753  | 0.47 |
| 138062_at   | neurexin I                                                                                                                               | 676  | 1447  | 0.47 |
| 116066_at   | RIKEN cDNA 4631402G10 gene                                                                                                               | 864  | 1833  | 0.47 |
| 132889_at   | Mus musculus transcribed sequences                                                                                                       | 680  | 1432  | 0.48 |
| 137650_at   | Mus musculus transcribed sequence with weak similarity to protein ref:NP_081764.1 (M.musculus) RIKEN cDNA 5730493B19 [Mus musculus]      | 852  | 1775  | 0.48 |
| 113596_at   | RIKEN cDNA 4931406I20 gene                                                                                                               | 6104 | 12710 | 0.48 |
| 167603_at   | RIKEN cDNA 1700113B09 gene                                                                                                               | 403  | 830   | 0.49 |

|             |                                                                                                                               |      |       |      |
|-------------|-------------------------------------------------------------------------------------------------------------------------------|------|-------|------|
| 170533_at   | Mus musculus transcribed sequence with weak similarity to protein ref:NP_067680.1 (H.sapiens) KIAA0721 protein [Homo sapiens] | 939  | 1934  | 0.49 |
| 162622_at   | RIKEN cDNA 3110004H13 gene                                                                                                    | 2378 | 4854  | 0.49 |
| 109330_at   | RIKEN cDNA 1810055G02 gene                                                                                                    | 1243 | 2530  | 0.49 |
| 166023_f_at | RIKEN cDNA 1700110I01 gene                                                                                                    | 677  | 1365  | 0.50 |
| 114274_at   | RIKEN cDNA 1810043H04 gene                                                                                                    | 5653 | 11273 | 0.50 |
| 113997_at   | secreted protein of unknown function                                                                                          | 7909 | 15679 | 0.50 |
